# Supplementary material for: Facile one-pot synthesis of MOF supported gold pseudo-single-atom catalysts for hydrogenation reactions
Source: Royal Society of Chemistry journal article supplement (doi:10.1039/c8qm00081f), 2018-01-01
Supplement: c8qm00081f1.pdf [file c8qm00081f1.pdf]

## Supplementary Information

### Facile one-pot synthesis of MOF supported gold pseudo-single-atom catalysts for hydrogenation reaction

Zumin Wang,<sup>a</sup> LinGu,<sup>b</sup> Li Song,<sup>c</sup> Hao Wang<sup>d</sup> and Ranbo Yu<sup>\*ad</sup>

- Department of Physical Chemistry, School of Metallurgical and Ecological Engineering, University of Science and Technology Beijing, Beijing 100083, PR China.
- Institute of Physics, Chinese Academy of Sciences, Beijing 100190, China.
- National Synchrotron Radiation Laboratory, CAS Center for Excellence in Nanoscience, University of Science and Technology of China, Hefei, Anhui 230029, PR China.
- Centre for Future Materials, University of Southern Queensland, Queensland, Australia.

\*Corresponding writer. E-mail: ranboyu@ustb.edu.cn; Fax: +86-10-62332525; Tel: +86-10-62332525.

### Materials Preparation

#### Chemicals

All chemicals were used as received of analytical grade without further purification. Cobalt chloride ( $\text{CoCl}_2 \cdot 6\text{H}_2\text{O}$ ), nickel chloride ( $\text{NiCl}_2 \cdot 6\text{H}_2\text{O}$ ) and cupric chloride ( $\text{CuCl}_2 \cdot 2\text{H}_2\text{O}$ ) were from Sinopharm Chemical Reagent Co. Ltd. 1-Dodecanethiol and polyvinyl pyrrolidone (PVP) with Mw = 55000 were purchased from Sigma-Aldrich. Other chemicals information was provided in the main manuscript.

#### Methods

##### Synthesis of other hydroxides

Copper hydroxide ( $\text{Cu}(\text{OH})_2$ ), cobalt hydroxide ( $\text{Co}(\text{OH})_2$ ), nickel hydroxide ( $\text{Ni}(\text{OH})_2$ ) suspension were prepared using the same procedure described above except that  $\text{CuCl}_2 \cdot 2\text{H}_2\text{O}$ ,  $\text{CoCl}_2 \cdot 6\text{H}_2\text{O}$ ,  $\text{NiCl}_2 \cdot 6\text{H}_2\text{O}$  was used instead of  $\text{FeCl}_2 \cdot 4\text{H}_2\text{O}$ .

##### Deposition- precipitation of Au precursors

The synthesis was the same in the main manuscript.

##### Synthesis of other Au/MOFs

The synthesis was the same for Au/FeBTC by mixing Au containing hydroxide solution and linker solution.

##### Synthesis of Pure MOFs

The synthesis was the same as the aforementioned process, except there was no  $\text{HAuCl}_4$  added.

### **Synthesis of Au/Al<sub>2</sub>O<sub>3</sub> and Au/P25**

A suspension of Al<sub>2</sub>O<sub>3</sub>/P25 in deionized water was formed, after homogenization by ultrasonication for 30 min, to achieve a reaction mixture. Then the procedures of Deposition- Precipitation of Au precursors were almost the same from above. After the mixing Al<sub>2</sub>O<sub>3</sub>/P25 suspension and treated gold precursor and readjusting the pH value of the mixture, the product was aged under stirring for 18h and then purified by filtration, washed with ethanol, then water and dried at 65 °C.

### **Synthesis of other Au NPs supported MOFs**

The synthesis were almost the same expect that during the deposition- precipitation process there is no adjusting pH value of chloroauric acid solution.

### **Synthesis of catalysts with method 1**

Method 1 refers to a pre-synthesized method, which involves synthesis of NPs individually first and subsequent mix metals with organic ligands to construct the MOF around them. So the synthesis can be divided into two steps:

First the NPs were prepared with PVP as ligands for protection and stabilization. Typically, a solution of PVP (0.5 g) in water (20 ml) was added dropwise to an aqueous solution of HAuCl<sub>4</sub> (0.026 mM, 150 ml) with rapid stirring in a round bottom flask (250 ml) under ice bath. Quickly, newly prepared NaBH<sub>4</sub> solution (100 mM, 10mL) was poured into the flask to trigger the reduction reaction. The mixture was refluxed with stirring for another 20 minutes. Then the mixture was further stirred at room temperature for 24 hours. The PVP-stabilized Au NPs were collected by centrifugation at 14,000 rpm for 30 minutes, washed by methanol for three times. Then the as-prepare NPs were placed in the solution of FeCl<sub>2</sub>. The following procedures are the same as the synthesis of pure MOF.

### **Synthesis of catalysts with method 2**

Method 2 was the same as method 1, which the pre-synthesized Au NPs were stabilized by 1-Dodecanethiol. Ethanol solution of 1-dodecanethiol (20 mM, 50 mL) was added to the solution of HAuCl<sub>4</sub> (0.026 mM, 100 mL) for surface capping. Then, newly prepared NaBH<sub>4</sub> solution (100 mM, 10mL) was added. And the mixture was stirred for 6 hours at room-temperature. The thioalcohol -stabilized Au NPs were collected by centrifugation at 14,000 rpm for 30 minutes, washed by ethanol and acetone repeatedly for three times. Then the as-prepare NPs were placed in the solution of FeCl<sub>2</sub>. The following procedures are the same as the synthesis of pure MOF.

### **Synthesis of catalysts with method 3**

Method 3 refers to a widely used pre-synthesized approach which use pre-synthesized MOFs as scaffold providing a confined space and heterogeneous sites for nucleation of the introduced metal precursors. First pure MOFs were synthesized by aforementioned method. They were dispersed in water again. Then a solution of

$\text{HAuCl}_4$ , which was brought to pH 10 by the addition of 0.2M  $\text{NaOH}$ , was added. Followed by the reduction by newly prepared  $\text{NaBH}_4$  solution.

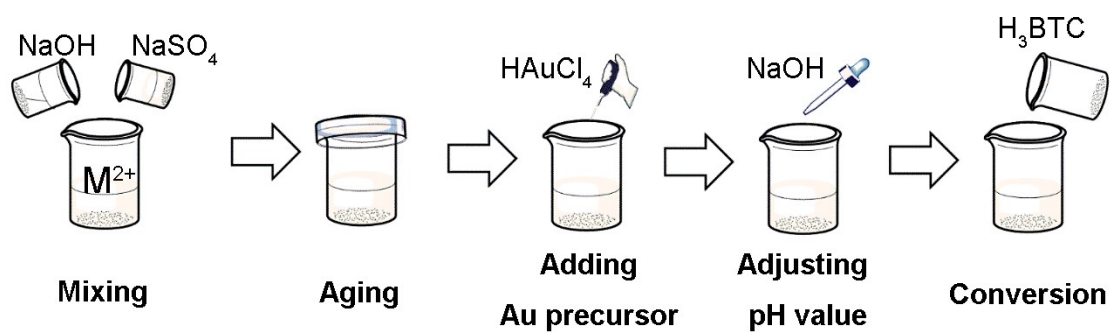

Scheme S1. Schematic illustration of the fabrication process of Au/MOF catalyst through pure beaker and solution chemistry by an in-situ reduction and conversion strategy

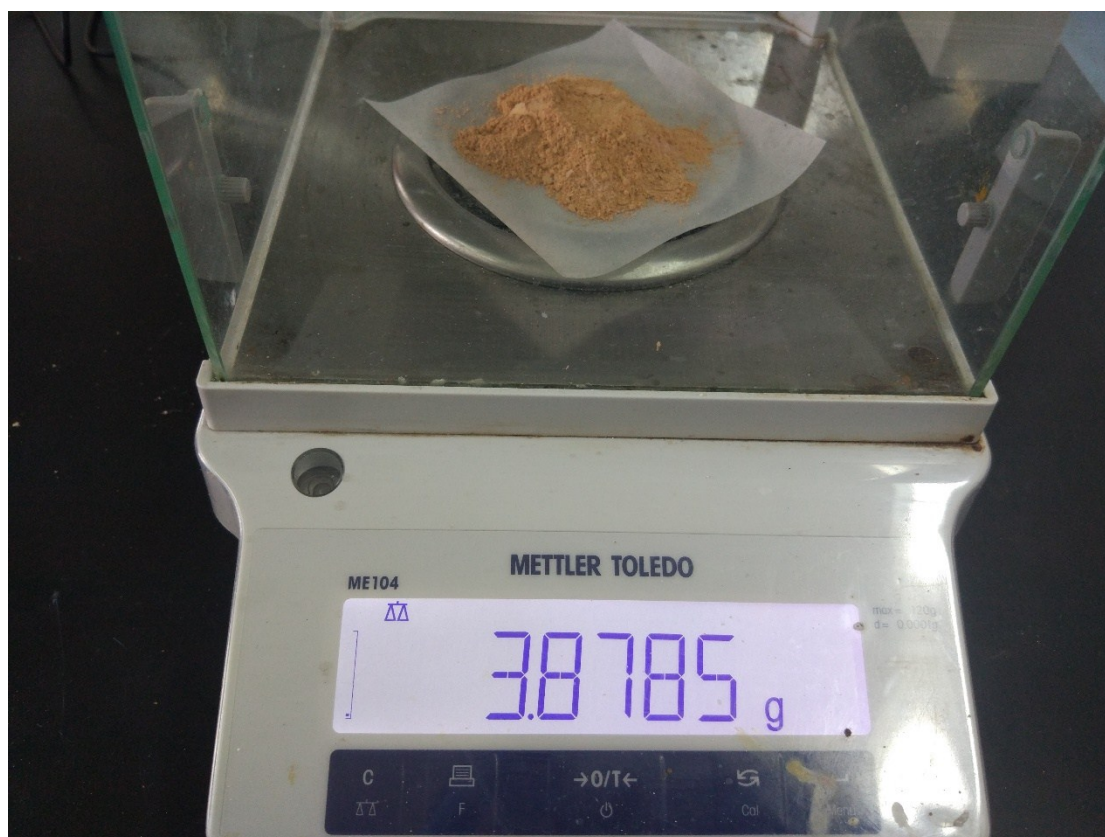

Figure S1. Digital photographs of products at gram level obtained from single synthetic batch

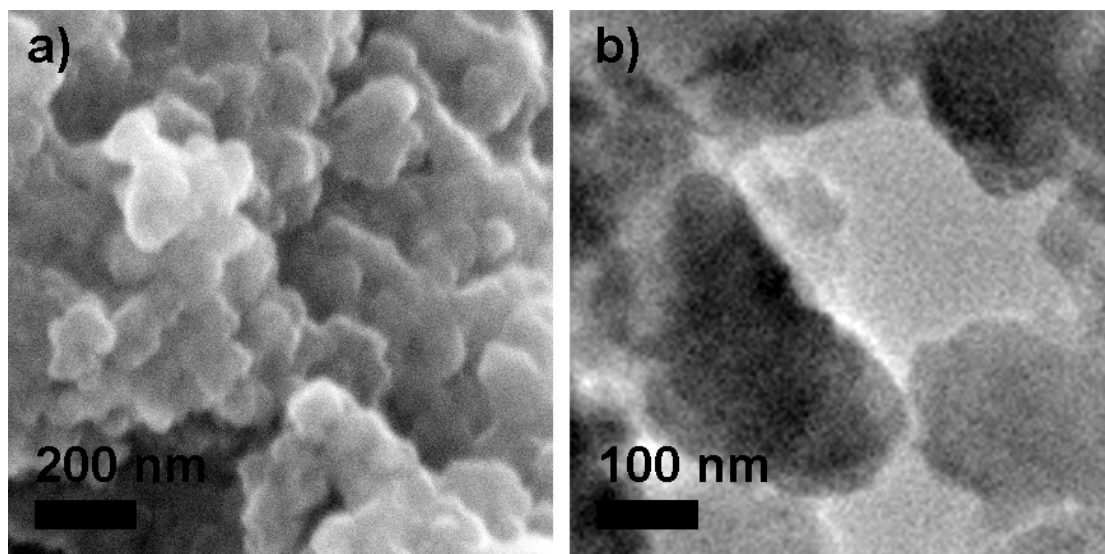

Figure S2. SEM and TEM images of as-prepared PSAC Au/FeBTC

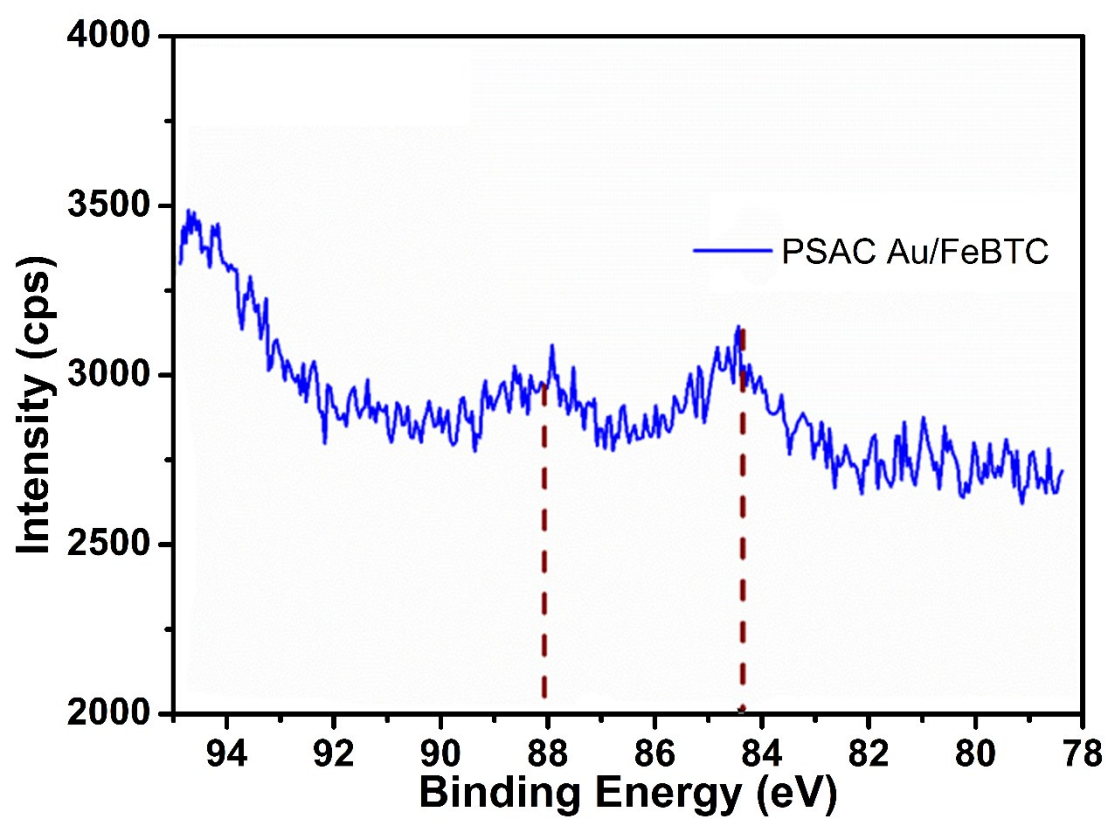

Figure S3. X-ray photoelectron spectroscopy analysis of the Au 4f of PSACs Au/FeBTC

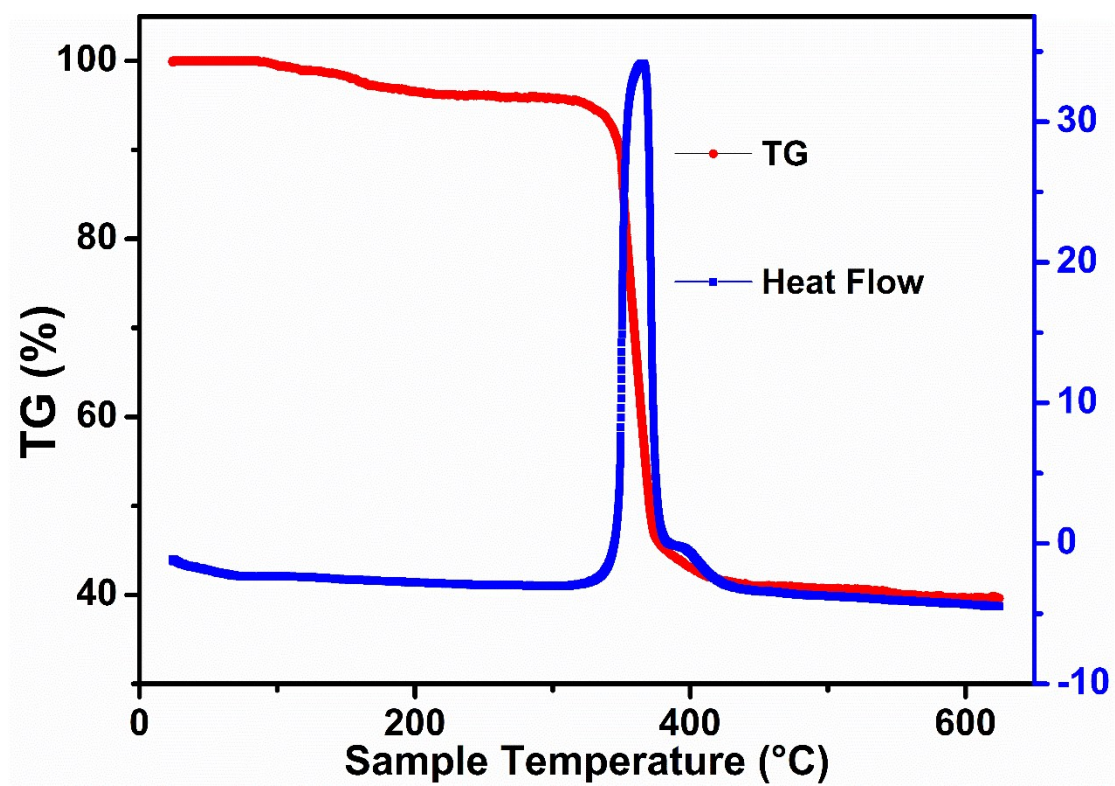

Figure S4 TG-DTA diagram of PSAC Au/FeBTC

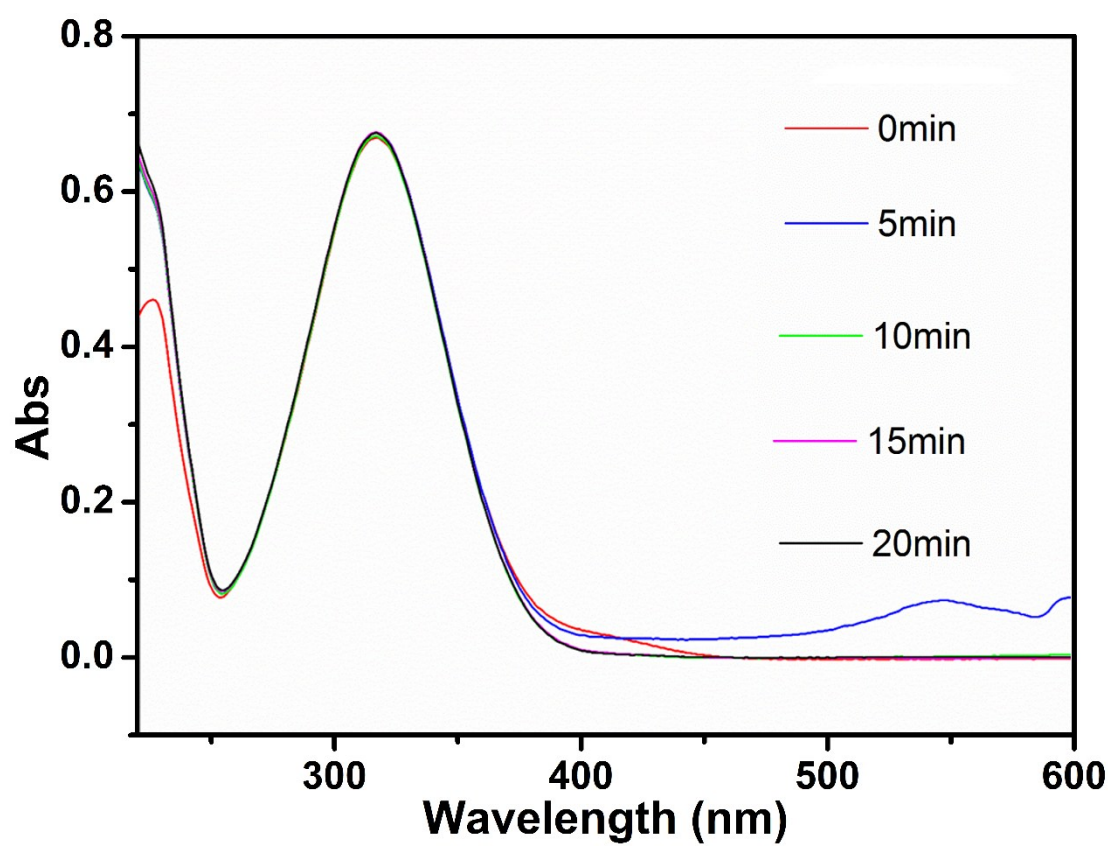

Figure S5. UV-vis spectrum for samples with catalysts but without adding hydrogen source

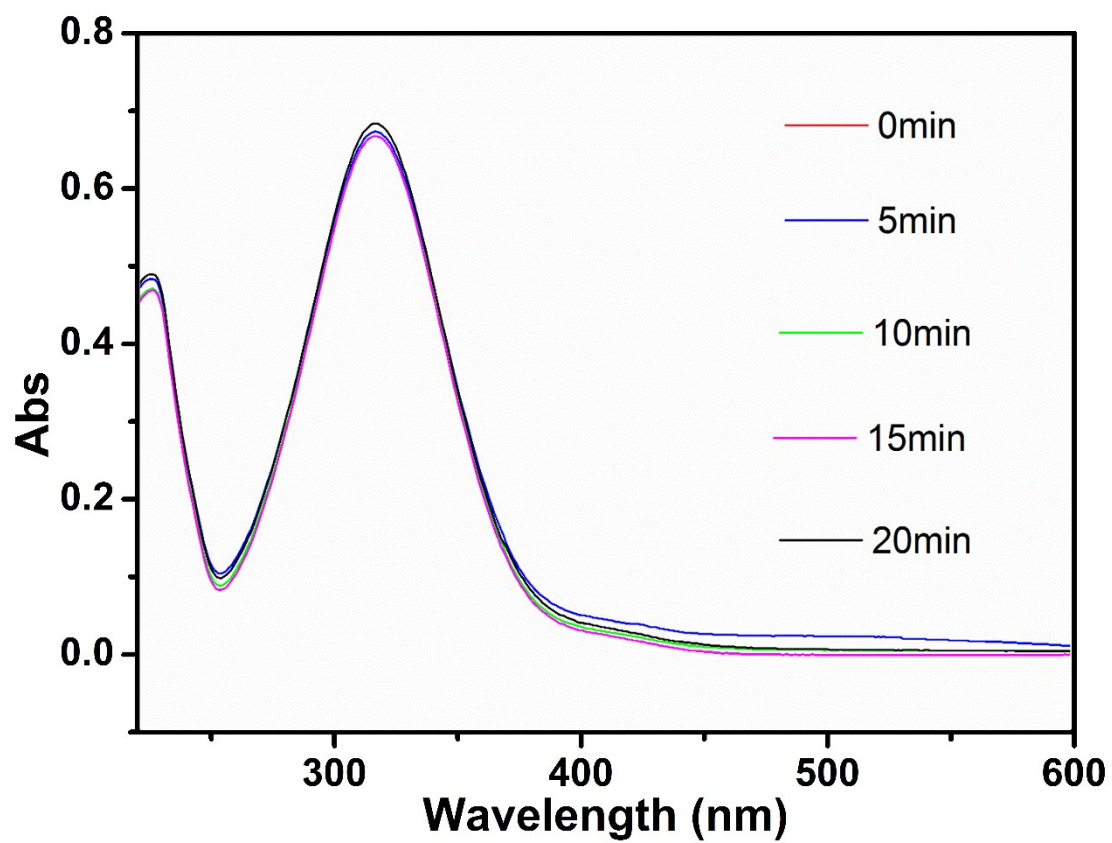

Figure S6. UV-vis spectrum for samples with hydrogen source but without adding catalysts

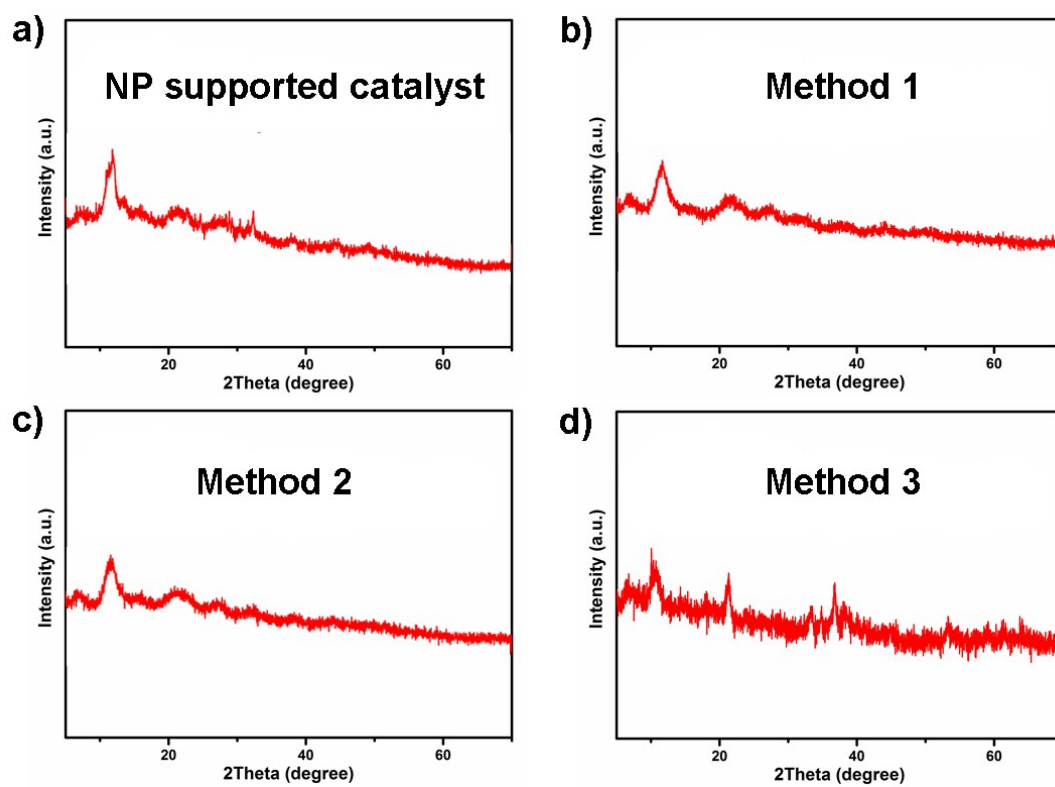

Figure S7 The morphology and crystallinity of the catalyst using different synthetic approach

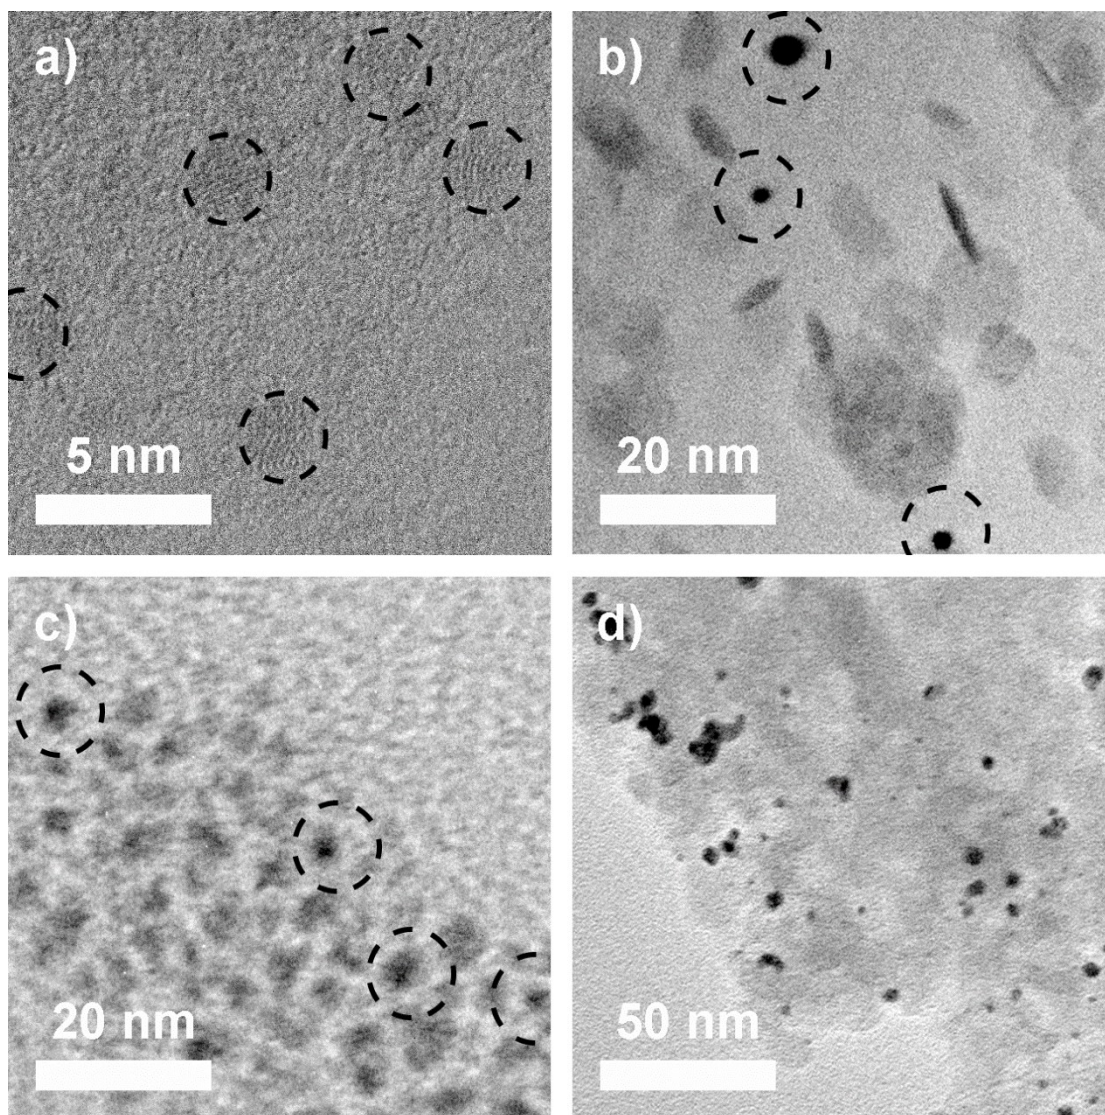

Figure S8 The morphologies of the catalyst using different synthetic approach

Table S1 The comparison of hydrogenation of p-nitrophenol performance of different material

| Noble metal NPs based catalysts                 | T (K) | k <sup>a</sup> (min <sup>-1</sup> ) | TOF <sup>b</sup> (min <sup>-1</sup> ) | paper                           |
|-------------------------------------------------|-------|-------------------------------------|---------------------------------------|---------------------------------|
| Au/FeBTC                                        | 298   | 2.49                                | 581                                   | This work                       |
| Fe <sub>3</sub> O <sub>4</sub> @Pt/MIL-100 (Fe) | 298   | 2.2                                 | 51.56                                 | Catal.Sci.&Tech., 2014. 4. 3013 |
| Fe <sub>3</sub> O <sub>4</sub> @Au/MIL-100 (Fe) | 298   | 0.248                               | 3.71                                  | Catal.Sci.&Tech., 2014. 4. 3013 |
| Pd@MIL-101                                      | 298   | 0.1138                              | 2.12                                  | Fun.M Lett., 2012. 05 1250039.  |
| Au@Ag/ZIF8                                      | 298   | 0.298                               | 0.2                                   | JACS, 2011. 133(5): 1304        |
| Au-Fe <sub>3</sub> O <sub>4</sub> @MIL-100(Fe)  | 298   | 5.53                                | 1.04                                  | Nanoscale, 2015. 7(3): 1201     |
| Au@COF(TpPa-1)                                  | 298   | 0.321                               | ~0.170                                | Chem Com., 2014. 50: 3169       |
| Au/SBA-15                                       | 298   | 19.44                               | 3.5                                   | NewJ.Chem, 2013. 37(8): 2399.   |
| Au/graphene hydrogel                            | 298   | 0.19                                | 0.19                                  | JMC 2012. 22(17): 8426          |
| Au@N-Doped Nanoporous Carbon Nanoparticle       | 298   | 0.2133                              | 7.9                                   | ChemCatChem, 2015:              |
| Au/micelle                                      | 298   | 0.089                               | 0.258                                 | J.Mole.Catal.A, 2007. 266: 233  |
| Au/ magnetic porous carbon                      | 298   | 0.6                                 | 0.590                                 | J.Mat.Chem.A, 2014. 2: 18775    |
| Au/Fe <sub>3</sub> O <sub>4</sub>               | 303   | 0.131                               | 4.13                                  | J.HazardMater, 2009. 165: 664.  |
| Au/GO/SiO <sub>2</sub>                          | 298   | 1.09                                | 17.1                                  | Nanoscale, 2012. 4(5): 1641.    |
| Au/CeO <sub>2</sub> triple shell                | 298   | 0.96                                | 4.60                                  | Chem. Sci., 2014. 5(11):4221    |
| TiO <sub>2</sub> @GOS@Au                        | 298   | 0.9                                 | 3.54                                  | Appl.Catal.A, 2015. 502: 239    |

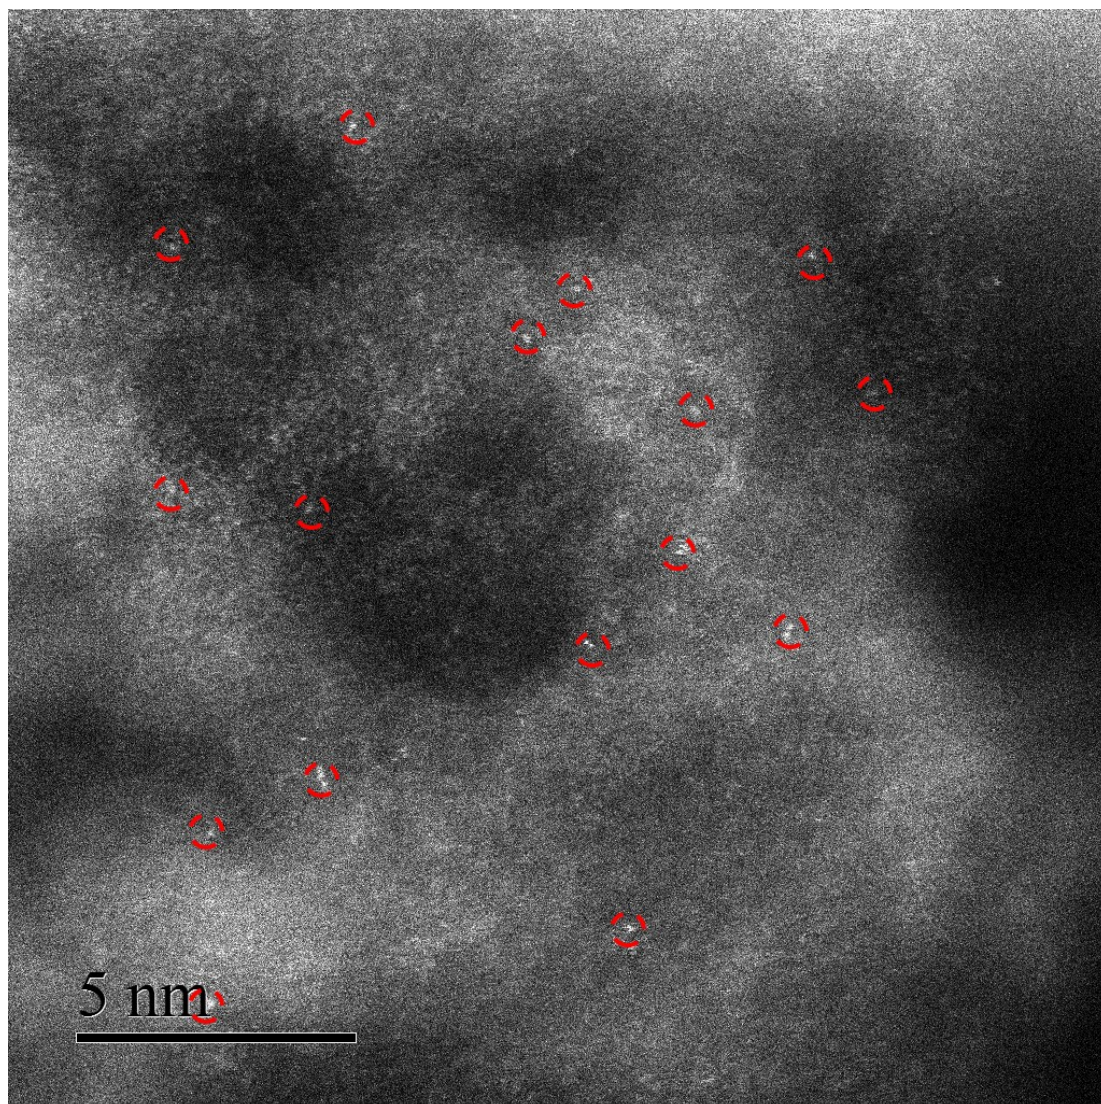

Figure S9 The morphology of the catalyst after the reaction from HAADF-STEM
